# Supplementary material for: Cropping practices manipulate abundance patterns of root and soil microbiome members paving the way to smart farming
Source: PubMed Central journal article supplement (PMC5771023; doi:10.1186/s40168-017-0389-9), 2018-01-16
Supplement: 40168_2017_389_MOESM1_ESM.pdf [file 40168_2017_389_MOESM1_ESM.pdf]

1 **Additional file 1**

2 **Cropping Practices Manipulate Abundance Patterns Of**  
3 **Root And Soil Microbiome Members Paving The Way To**  
4 **Smart Farming**

5

6

7 Kyle Hartman<sup>1,2</sup>, Marcel G.A. van der Heijden<sup>1,2,4</sup>, Raphaël A. Wittwer<sup>1</sup>, Samiran  
8 Banerjee<sup>1</sup>, Jean-Claude Walsler<sup>3</sup>, and Klaus Schlaeppli<sup>1\*</sup>

9

10

11

12 **SUPPLEMENTARY METHODS**

13

14 **Chemical soil analysis**

15 We collected soil samples for chemical analysis in March 2014, before the application of  
16 fertilizers or weed control measures. We took 20 soil cores with a soil auger (ø 2.5 cm)  
17 in the inner 2 x 10 m of each subplot to a soil depth of 0-20 cm and combined them to  
18 one meta-sample per plot. The samples were then sieved at 2 mm and kept at 4°C until  
19 analysis. Soil samples were analyzed for pH, organic and total C, total N, and soil  
20 texture, extracted with 1:10 ammonia-acetate-EDTA and determined according to the  
21 reference methods of the Swiss Federal Research Stations [1].

22

23 **16S PCR and library preparation**

24 The 16S amplicon library was generated using the PCR primers 799F [2] and 1193R [3].  
25 The primers were extended at the 5' end with an error-tolerant barcode for multiplexed  
26 library sequencing (**Supplementary Data S1**). PCR reactions were performed on a  
27 iCycler instrument (BioRad, Hercules, CA, USA) using the 5PRIME Hot Master Mix PCR  
28 system (5 PRIME, Gaithersburg, MD USA) with the cycling conditions in **Table S1**. Each  
29 20 µL reaction contained: 8 µL 5PRIME Hot Master Mix, 0.3 % BSA, 200 nM each  
30 primer, and 2 ng and 10 ng of DNA template for soil and root reactions respectively, and  
31 the remaining volume sterile distilled water. PCR reactions were conducted in  
32 quadruplicates and pooled together before inspecting 3 µL of each sample on a 1 %  
33 agarose gel at 90 V for 45 min for correct size and absence of contamination in non-  
34 template reactions. PCR reactions were then purified using the NucleoSpin Gel and  
35 PCR Clean up Kit (Machery-Nagel GmbH & Co. KG, Düren, Germany) according to the  
36 manufacturer's instructions. The purified reactions were quantified using the same  
37 Picogreen assay described above and pooled in equal amounts (100 ng / sample), after  
38 which the library volume was reduced using a CentriVap centrifugal vacuum  
39 concentrator (Labconco Corp., Kansas City, MO, USA). The concentrated library was  
40 mixed with loading dye, split equally between 2 lanes of a 1.2 % agarose gel to separate  
41 the 'bacteria band' from the ~800 bp mitochondria product also produced by the  
42 primers. Bacteria bands were cut and these gel fragments purified using the kit

43 described above, eluted in 50  $\mu\text{L}$  of the supplied elution buffer and measured using a  
44 Qubit assay (Agilent Technologies, Santa Clara, USA).

45

#### 46 **ITS PCR and library preparation**

47 The ITS amplicon library was generated using the PCR primers fITS7 [4] and ITS4 [5].  
48 The primers were extended at the 5' end with an error-tolerant barcode for multiplexed  
49 library sequencing (**Supplementary Data S1**). PCR reactions were performed on an  
50 iCycler instrument (BioRad, Hercules, CA, USA) using the DreamTaq PCR system  
51 (Thermo-Fisher Scientific, Waltham, MA, USA) with the cycling conditions in **Table S1**.  
52 Each 20  $\mu\text{L}$  reaction contained: 10  $\mu\text{L}$  DreamTaq PCR MasterMix (DreamTaq DNA  
53 Polymerase, 1x DreamTaq Buffer, 2 mM  $\text{MgCl}_2^+$ , 200  $\mu\text{M}$  each dNTP), supplemental  
54  $\text{MgCl}_2^+$  to 2.75 mM, 0.3 % BSA, 500 nM of the forward primer, 200 nM of the reverse  
55 primer, 10 ng of DNA template for both soil and root samples, and the remaining volume  
56 sterile distilled water. PCR reactions were conducted in quadruplicates and pooled  
57 together before validation by gel electrophoresis. The reactions were quantified using a  
58 Picogreen assay and pooled in equal amounts (200 ng / sample). The volume of the  
59 pooled library was reduced using a CentriVap centrifugal vacuum concentrator  
60 (Labconco Corp., Kansas City, MO, USA), mixed with loading dye and subjected to  
61 separation on a 1.5% agarose gel. The bands between 300-500 bp were cut from the  
62 gel and purified with the NucleoSpin Gel and PCR Clean up Kit (Machery-Nagel GmbH  
63 & Co. KG, Düren, Germany) according to the manufacturer's instructions, eluted in 50  
64  $\mu\text{L}$  of the supplied elution buffer, and the DNA quantified using a Qubit assay (Agilent  
65 Technologies, Santa Clara, USA).

66

#### 67 **Library sequencing**

68 Preparation of the 16S and ITS amplicon libraries was conducted as follows: The  
69 TruSeq DNA Sample Prep Kit v2 (Illumina, San Diego, CA, USA) was used following the  
70 manufacturer's instructions. Briefly, the amplicon samples were end-repaired and  
71 polyadenylated. TruSeq adapters containing the index for multiplexing were ligated to  
72 the amplicon samples. The ligated samples were run on a 2% agarose gel and the  
73 desired fragment length was excised (50 bp +/- the target fragment length). DNA from  
74 the gel was purified with MinElute Gel Extraction Kit (Qiagen, Hilden, Germany).  
75 Fragments containing TruSeq adapters on both ends were selectively enriched with  
76 PCR using 4 cycles. The quality and quantity of the enriched libraries were validated  
77 using Qubit and TapeStation (Agilent Technologies, Santa Clara, CA USA). The libraries  
78 were normalized to 4 nM in Tris-Cl 10 mM, pH 8.5 with 0.1% Tween 20. The library was  
79 sequenced on the Illumina MiSeq Personal Sequencer (Illumina, San Diego, USA) using  
80 a 600 cycle v3 Sequencing kit (Cat n° MS-102-3003), paired-end 2x 300 cycle  
81 sequencing mode at the Functional Genomics Center Zurich ([www.fgcz.ch](http://www.fgcz.ch)).

## 82 SUPPLEMENTARY RESULTS

### 84 Taxonomic profiles of soil and root bacterial and fungal communities

85 Differences between the soil and root microbiota were evident in the taxonomic profiles  
86 of both sample types. We noted 30 bacteria phyla present in soil samples, with  
87 Proteobacteria (39.3%), Actinobacteria (31.2%), and Firmicutes (6.3%) having the  
88 highest relative abundances (**Fig. S3**). We found 25 different phyla in root samples with  
89 Actinobacteria (41%), Proteobacteria (39.7%), and Bacteroidetes (10.7%) being most  
90 abundant. In fungal communities, soils contained at least six phyla, with abundant  
91 Ascomycota (72.2%), Basidiomycota (9.4%) and Zygomycota (4.9%). OTUs from  
92 unassigned phyla made up ~11.9% of fungi OTUs. In root samples, we also found  
93 OTUs from at least six phyla with abundant Ascomycota (80.6%) and Basidiomycota  
94 (16.2%). OTUs from unassigned phyla comprised ~3% of the community. We found that  
95 the proportion of sequences from the phylum Glomeromycota, which contain the  
96 arbuscular mycorrhizal fungi (AMF), was generally very low in both sample types (mean  
97 relative abundance of 1% in soil samples and 0.02% in root samples), confirming that  
98 the primer combination fITS7 - ITS4 is suboptimal to characterize AMF communities  
99 (**Fig. S3**). It is known that general fungal ITS primers poorly resolve and discriminate  
100 AMF taxa [6,7].

### 102 Taxonomic patterns of *csOTUs*

103 Cropping sensitive OTUs (*csOTUs*) were identified based on indicator species analysis  
104 and using likelihood ratio tests. The 53 *csOTUs* in the soil bacterial community (**Fig. S6**)  
105 comprised at least 11 phyla, with the majority of community sequences belonging to the  
106 Actinobacteria (25.4%), Proteobacteria (22.5%) and Firmicutes (18.4%). We noted that  
107 specific phyla tended to respond to specific management systems and tillage regimes.  
108 OTUs belonging to the Firmicutes favored organically managed plots (**Fig. S7**).  
109 Bacteroidetes OTUs tended towards higher mean abundances in no-till and reduced  
110 tillage treatments; whereas mean abundances of OTUs from the Acidobacteria and  
111 Verrucomicrobia were higher in the full-tillage treatments. OTUs from the Chloroflexi  
112 tended to favor the O-RT system. We also examined the taxonomic assignment and  
113 mean relative abundances of the individual *csOTUs* across the four cropping systems  
114 (**Fig. S8**). We noted higher relative abundances of Firmicutes OTUs *bOTU36* (family  
115 *Erysipelotrichaceae*), *bOTU23*, *bOTU119* (both *Peptostreptococcaceae*) and *bOTU341*  
116 (*Clostridiaceae*) in organically managed plots, consistent with patterns seen at the  
117 phylum level (**Figs. S7-S9**). We observed similar patterns for OTUs from the phylum  
118 Acidobacteria (*bOTU806*, *bOTU885*, *bOTU238*, *bOTU651*, family unassigned), which  
119 were consistently more abundant in plots receiving intensive tillage (**Figs. S8, S9**).

120 The bulk soil fungal community comprised 70 *csOTUs* (**Fig. S6**) classified into at  
121 least six different phyla, with Ascomycota (81.2% of sequences) unassigned (8.5%) and  
122 Basidiomycota (5.5%) being the most abundant (**Fig. S7**). We observed a number of  
123 known Ascomycota OTUs, possibly belonging to pathogenic fungi, that were abundant  
124 in C-NT system (*fOTU57*, family *Nectriaceae*) and organically managed plots (*fOTU32*  
125 *Nectriaceae*; *fOTU25* and *fOTU1628 Sporormiaceae*) (**Figs. S8, S10**). We also noted

126 that a single OTU from the phylum Glomeromycota (*fOTU980*, family *Diversisporaceae*)  
127 was absent in C-IT samples and enriched in O-IT.

128 In root bacterial communities, the 63 *csOTUs* (**Fig. S6**) were classified into ten  
129 different phyla, with Actinobacteria, Proteobacteria and Firmicutes having the highest  
130 relative abundances (73.4%, 13.2%, and 9.5% of sequences, respectively; **Fig. S7**).  
131 Across the four cropping systems, OTUs from the Actinobacteria were equally well  
132 represented. OTUs from the Proteobacteria and Bacteroidetes, were more abundant in  
133 reduced and no-tillage plots. Like in the soil bacterial community, the Firmicutes were  
134 generally more abundant in root samples from organically managed plots. This  
135 appeared to be driven by the increased abundance of several OTUs from the family  
136 *Peptostreptococcaceae* (*bOTU23*, *bOTU119*), *Clostridiaceae* (*bOTU341*),  
137 *Erysipelotrichaceae* (*bOTU36*), and *Lachnospiraceae* (*bOTU1403*), a family that was  
138 exclusive to organically managed plots. (**Figs. S8, S11**).

139 The 36 *csOTUs* (**Fig. S6**) in root fungal communities were classified into at least  
140 three phyla. Most sequences belonged to the Ascomycota (75.9%), followed by  
141 unassigned phyla (14.1%), and Basidiomycota (9.8%; **Fig. S7**). We noted that OTUs  
142 from the Ascomycota favored the C-NT system and, to a lesser extent, the organically  
143 managed plots. The O-RT system supported a higher abundance of OTUs belonging to  
144 unassigned phyla and the Basidiomycota. Many of the cropping sensitive OTUs were  
145 unassigned at lower taxonomic levels (**Fig. S8**). However, in the Ascomycota, *fOTU63*  
146 (*Pleosporaceae*) and *fOTU97* (*Phaeosphaeriaceae*) were abundant in the C-NT system,  
147 while the *Psathyrellaceae* *fOTU86* was abundant in the O-RT system (**Figs. S8, S12**).  
148 We also noted a number of OTUs from the family *Lasiosphaeriaceae* with higher mean  
149 abundances in the O-IT treatment.

## 150 SUPPLEMENTARY DISCUSSION

151

### 152 **Cropping system effects on soil microbial communities**

153 We found significant effects of cropping system on soil microbial communities,  
154 explaining approximately 30% of the total variation in both bacteria and fungi (**Fig. 2**).  
155 More specifically, bacterial communities were more strongly separated by the different  
156 tillage regimes rather than by management type, with the biggest differences between  
157 intensive tillage samples and those receiving less intensive tillage (**Table S4**). This  
158 finding is somewhat unexpected given that earlier work has shown that the addition of  
159 manure, as is the case in the organically managed plots, can result in substantial shifts  
160 in soil bacterial community [8–11]. Moreover, bacteria are generally thought to be  
161 relatively unaffected by tillage practices, given their small cell size and constrained  
162 dispersal and are therefore, less likely to be affected by the homogenization of soil  
163 microsites [12,13].

164 It has also been suggested that bacteria introduced into soils from manure  
165 amendments do not become prominent [9] and that any bacterial community  
166 compositional shifts as a result of manure additions tend to diminish over time [8–10].  
167 However, these results would seemingly conflict with a number of recent studies that  
168 have profiled microbial communities in soils receiving inorganic and organic fertilizer  
169 and found substantial differences between the two fertilizer regimes [14–17]. For  
170 example, Hartmann et al., [15] profiled soil microbial communities from a long-term (>20  
171 years) Swiss agricultural experiment comparing five different management systems  
172 receiving either mineral fertilizer or farm yard manure. They found that the application of  
173 farm yard manure was the primary driving force behind bacterial community  
174 dissimilarity. Thus, we hypothesize our findings could be attributed to two reasons. First,  
175 because we collected soil samples over two months after the final application of manure  
176 in the organically managed plots, any initial changes to the bacterial community may  
177 have largely disappeared by the time the samples were collected. Second, the  
178 abovementioned studies reporting manure induced shifts in bacterial community  
179 composition were all conducted on long-term agricultural trials under decades of manure  
180 amendment. Although the entire FAST experimental site has been under organic  
181 management since 2002, the cropping treatments were only established for FAST II in  
182 2010 [18]. Therefore, our results may be indicative of the relatively short period of  
183 manure amendments at the site.

184 In contrast to soil bacteria, constrained ordinations of soil fungal communities  
185 revealed that differences between conventional and organic management types  
186 explained most of the variation (**Fig. 2**). Despite the relatively short term management of  
187 the FAST site, our results are more in accordance with previous studies on long-term  
188 (>20 years) agricultural trials that reported significant effects of organic management  
189 with manure fertilization on soil fungal community composition [15,19]. Studies on soil  
190 communities subjected to organic management with manure additions over the short  
191 term (typically less than 10 years) have tended to report no significant differences in  
192 fungal community structure between manure amended and non-amended soils [20,21].  
193 However, these shorter-term studies relied on older molecular tools, which may be less  
194 precise in capturing subtle community shifts compared to amplicon sequencing [19].

195 Nevertheless, there is evidence that the addition of manure to soils represents an  
196 input of external microbes that could affect strong changes in the diversity and  
197 composition of both bacterial and fungal communities over the course of a growing  
198 season [19,22]. With this in mind, our results highlight the need for future studies to  
199 assess the temporal variability in soil communities receiving external microbial inputs,  
200 such as manure. Sampling at multiple time points, including before manure application,  
201 would shed light on the dynamics of the bacterial and fungal communities during the  
202 course of the growing season. This could help to improve estimates of microbial  $\alpha$ -  
203 diversity, which have been shown to exhibit greater temporal variability than across  
204 different land use types [23]. Furthermore, future studies would benefit from the  
205 inclusion of manure samples in high-throughput sequencing runs for the direct  
206 identification of manure-derived bacteria and fungi OTUs based on sequence similarity.

207 We found that an increase in tillage intensity from reduced tillage to intensive  
208 tillage resulted in significantly different soil fungal communities in organically managed  
209 plots; whereas the same was not observed between no-till and intensive tillage samples  
210 in conventional plots (**Table S4**). This suggests that tillage effects on soil fungal  
211 communities may depend on other factors, such as management type. Other previous  
212 work on the effects of soil disturbance events on soil fungi have often focused on AMF  
213 as a group of fungi sensitive to increasing tillage intensity [24–26]. However, we are  
214 unable to draw conclusions about effects of tillage on AMF communities at the FAST  
215 site due to very low abundances of AMF sequences (**Fig. S3**). It is generally thought  
216 that tillage affects soil AMF communities through physical destruction of dense hyphal  
217 networks [27]. Such mechanisms of physical disturbance are also thought to influence  
218 communities of general soil fungi, and therefore less soil disturbance and more  
219 heterogeneous resource distribution, common of no till and reduced tillage systems,  
220 may promote fungal communities [28]. Many hypotheses about the effects of tillage on  
221 fungal communities also focus on indirect effects, namely that tillage influences edaphic  
222 factors like soil organic carbon content [29,30] and soil nutrient pools like extractable P  
223 [31], which have been shown to influence soil fungal community composition. Similarly,  
224 our unconstrained ordination analyses revealed that differences in pH explained  
225 approximately 24% and 27% of community variation in the soil bacterial and fungal  
226 communities, respectively (**Fig. S4**). These results are generally consistent with  
227 previous findings showing soil pH as a significant driver of primarily bacterial community  
228 composition [32,33], but also of fungi [34]. However, it is important to stress that our  
229 findings were less the result of a true pH gradient across multiple samples and more the  
230 result of a low pH value in one subplot.

231

### 232 **Cropping system effects on microbial $\alpha$ -diversity**

233 We have assessed the effects of cropping systems on observed bacteria and fungi OTU  
234 richness in both soil and root samples, confirming that soils were more diverse than root  
235 microbial communities [35,36]. With respect to the effects of cropping system, we found  
236 the soil bacteria and fungi tended to be richest in the O-IT system (**Fig. S5, Table S3**).  
237 These observations are in accordance with previous studies reporting higher soil  
238 microbial richness in organically managed compared to conventionally managed soils  
239 (bacteria: 29, 50, 51; fungi: 29, 52). However, there are also studies reporting no

240 differences between conventional and organic managements [40,41]. We speculate that  
241 timing differences between application and sampling might explain conflicting results, in  
242 that any enhanced diversity effects might disappear in the time span between manure  
243 application and sampling.

244 The effects of differential soil managements on the root microbes appear to vary  
245 depending on the root compartment analyzed. Edwards et al., [42] found differences in  
246 bacteria  $\alpha$ -diversity in the rhizosphere but not rhizoplane and endosphere compartments  
247 when comparing samples from conventional and organically managed cropping  
248 systems. Also Seghers et al., [43] found no difference in maize root endophyte richness  
249 (bacteria and fungi) in samples taken from conventionally and organically managed  
250 plots. Soil management seems to affect microbial communities to lesser extents the  
251 more intimate they associate with their host plant. We think that our root sampling  
252 method without physical (no sonication) or chemical (no detergent or bleach) separation  
253 from the rhizosphere compartment yields a rather low-intimacy type of compartment and  
254 we expected to find impacts by soil management. Indeed, we found effects of cropping  
255 practices on observed root OTU richness. We found significantly higher richness in in  
256 O-IT plots compared to conventionally managed plots for the bacteria (**Fig. S5; Table**  
257 **S3**).

258 Taken together, we find enhanced richness in root and soil microbiota in O-IT  
259 systems. We think that the application of animal manure as fertilizer coupled with  
260 structural disturbance presents a likely explanation for the enhanced diversity in organic  
261 intensive tillage systems.

262 **SUPPLEMENTARY REFERENCES**

- 263 1. Eidgenössische Forschungsanstalten FAL, RAC F. Schweizerische  
264 Referenzmethoden der Eidgenössischen landwirtschaftlichen Forschungsanstalten.  
265 Zürich: Eidg. Forschungsanstalt für Landwirtschaftlichen Pflanzenbau, FAP; 1996.
- 266 2. Chelius MK, Triplett EW. The Diversity of Archaea and Bacteria in Association with  
267 the Roots of *Zea mays* L. *Microb. Ecol.* 2001;41:252–63.
- 268 3. Bodenhausen N, Horton MW, Bergelson J. Bacterial communities associated with  
269 the leaves and the roots of *Arabidopsis thaliana*. *PLoS One.* 2013;8:e56329.
- 270 4. Ihrmark K, Bödeker ITM, Cruz-Martinez K, Friberg H, Kubartova A, Schenck J, et al.  
271 New primers to amplify the fungal ITS2 region--evaluation by 454-sequencing of  
272 artificial and natural communities. *FEMS Microbiol. Ecol.* 2012;82:666–77.
- 273 5. White T, Bruns T, Lee S, Taylor J. Amplification and direct sequencing of fungal  
274 ribosomal RNA Genes for phylogenetics. In: Innis M, Gelfland D, Sninsky J, White  
275 T, editors. *PCR Protoc. A Guid. to Methods Appl.* San Diego, CA: Academic Press;  
276 1990. p. 315–22.
- 277 6. Stockinger H, Krüger M, Schüßler A. DNA barcoding of arbuscular mycorrhizal  
278 fungi. *New Phytol.* 2010;187:164.
- 279 7. Kohout P, Sykorova Z, Ctvrtlíková M, Rydlova J, Suda J, Vohník M, et al.  
280 Surprising spectra of root-associated fungi in submerged aquatic plants. *FEMS*  
281 *Microbiol. Ecol.* 2012;80:216–35.
- 282 8. Hammesfahr U, Heuer H, Manzke B, Smalla K, Thiele-Bruhn S. Impact of the  
283 antibiotic sulfadiazine and pig manure on the microbial community structure in  
284 agricultural soils. *Soil Biol. Biochem.* 2008;40:1583–91.
- 285 9. Heuer H, Focks A, Lamshöft M, Smalla K, Matthies M, Spiteller M. Fate of  
286 sulfadiazine administered to pigs and its quantitative effect on the dynamics of  
287 bacterial resistance genes in manure and manured soil. *Soil Biol. Biochem.*  
288 2008;40:1892–900.
- 289 10. Jechalke S, Focks A, Rosendahl I, Groeneweg J, Siemens J, Heuer H, et al.  
290 Structural and functional response of the soil bacterial community to application of  
291 manure from difloxacin-treated pigs. *FEMS Microbiol. Ecol.* 2014;87:78–88.
- 292 11. Jangid K, Williams MA, Franzluebbbers AJ, Sanderlin JS, Reeves JH, Jenkins MB, et  
293 al. Relative impacts of land-use, management intensity and fertilization upon soil  
294 microbial community structure in agricultural systems. *Soil Biol. Biochem.*  
295 2008;40:2843–53.
- 296 12. Strickland MS, Rousk J. Considering fungal:bacterial dominance in soils – Methods,  
297 controls, and ecosystem implications. *Soil Biol. Biochem.* 2010;42:1385–95.
- 298 13. Hendrix P, Parmelee R, Crossley Jr D, Coleman D, Odum E, Groffman P. Detritus  
299 Food Webs in Conventional and No- Tillage Agroecosystems. *Bioscience.*  
300 1986;36:374–80.



- 301 14. Li F, Chen L, Zhang J, Yin J, Huang S. Bacterial Community Structure after Long-  
302 term Organic and Inorganic Fertilization Reveals Important Associations between  
303 Soil Nutrients and Specific Taxa Involved in Nutrient Transformations. *Front.*  
304 *Microbiol.* 2017;8:10.3389/fmicb.2017.00187.
- 305 15. Hartmann M, Frey B, Mayer J, Mäder P, Widmer F. Distinct soil microbial diversity  
306 under long-term organic and conventional farming. *ISME J.* 2014;9:1177–1194.
- 307 16. Ding J, Jiang X, Ma M, Zhou B, Guan D, Zhao B, et al. Effect of 35 years inorganic  
308 fertilizer and manure amendment on structure of bacterial and archaeal  
309 communities in black soil of northeast China. *Appl. Soil Ecol.* 2016;105:187–95.
- 310 17. Francioli D, Schulz E, Lentendu G, Wubet T, Buscot F, Reitz T. Mineral vs. organic  
311 amendments: Microbial community structure, activity and abundance of  
312 agriculturally relevant microbes are driven by long-term fertilization strategies. *Front.*  
313 *Microbiol.* 2016;7:10.3389/fmicb.2016.01446.
- 314 18. Wittwer RA, Dorn B, Jossi W, van der Heijden MGA. Cover crops support ecological  
315 intensification of arable cropping systems. *Sci. Rep.* 2017;7:10.1038/srep41911.
- 316 19. Lentendu G, Wubet T, Chatzinotas A, Wilhelm C, Buscot F, Schlegel M. Effects of  
317 long-term differential fertilization on eukaryotic microbial communities in an arable  
318 soil: A multiple barcoding approach. *Mol. Ecol.* 2014;23:3341–55.
- 319 20. Marschner P, Kandeler E, Marschner B. Structure and function of the soil microbial  
320 community in a long-term fertilizer experiment. *Soil Biol. Biochem.* 2003;35:453–61.
- 321 21. Lejon DPH, Sebastia J, Lamy I, Chaussod R, Ranjard L. Relationships between soil  
322 organic status and microbial community density and genetic structure in two  
323 agricultural soils submitted to various types of organic management. *Microb. Ecol.*  
324 2007;53:650–63.
- 325 22. Zhen Z, Liu H, Wang N, Guo L, Meng J, Ding N, et al. Effects of manure compost  
326 application on soil microbial community diversity and soil microenvironments in a  
327 temperate cropland in China. *PLoS One.* 2014;9:e108555.
- 328 23. Lauber CL, Ramirez KS, Aanderud Z, Lennon J, Fierer N. Temporal variability in soil  
329 microbial communities across land-use types. *ISME J.* 2013;7:1641–50.
- 330 24. Jansa J, Mozafar A, Anken T, Ruh R, Sanders IR, Frossard E. Diversity and  
331 structure of AMF communities as affected by tillage in a temperate soil. *Mycorrhiza.*  
332 2002;12:225–34.
- 333 25. Drijber RA, Doran JW, Parkhurst AM, Lyon DJ. Changes in soil microbial community  
334 structure with tillage under long-term wheat- fallow management. *Soil Biol. Biochem.*  
335 2000;32:1419–1430.
- 336 26. Alguacil M., Lumini E, Roldan A, Salinas-Garcia J, Bonafante P, Bianciotto V. The  
337 impact of tillage practices on arbuscular mycorrhizal fungal diversity in subtropical  
338 crops. *Ecol. Appl.* 2008;18:527–36.
- 339 27. Verbruggen E, Kiers TE. Evolutionary ecology of mycorrhizal functional diversity in  
340 agricultural systems. *Evol. Appl.* 2010;3:547–60.

- 341 28. Helgason BL, Walley FL, Germida JJ. Fungal and bacterial abundance in long-term  
342 no-till and intensive-till soils of the Northern Great Plains. *Soil Sci. Soc. Am. J.*  
343 2009;73:120–7.
- 344 29. Wang Z, Chen Q, Liu L, Wen X, Liao Y. Responses of soil fungi to 5-year  
345 conservation tillage treatments in the drylands of northern China. *Appl. Soil Ecol.*  
346 2016;101:132–40.
- 347 30. Liu J, Sui Y, Yu Z, Shi Y, Chu H, Jin J, et al. Soil carbon content drives the  
348 biogeographical distribution of fungal communities in the black soil zone of  
349 northeast China. *Soil Biol. Biochem.* 2015;83:29–39.
- 350 31. Lauber CL, Strickland MS, Bradford MA, Fierer N. The influence of soil properties on  
351 the structure of bacterial and fungal communities across land-use types. *Soil Biol.*  
352 *Biochem.* 2008;40:2407–15.
- 353 32. Fierer N, Jackson RB. The diversity and biogeography of soil bacterial communities.  
354 *Proc. Natl. Acad. Sci. U. S. A.* 2006;103:626–31.
- 355 33. Lauber CL, Hamady M, Knight R, Fierer N. Pyrosequencing-based assessment of  
356 soil pH as a predictor of soil bacterial community structure at the continental scale.  
357 *Appl. Environ. Microbiol.* 2009;75:5111–20.
- 358 34. Rousk J, Bååth E, Brookes PC, Lauber CL, Lozupone C, Caporaso JG, et al. Soil  
359 bacterial and fungal communities across a pH gradient in an arable soil. *ISME J.*  
360 2010;4:1340–51.
- 361 35. Bulgarelli D, Schlaeppi K, Spaepen S, Ver Loren van Themaat E, Schulze-Lefert P.  
362 Structure and functions of the bacterial microbiota of plants. *Annu. Rev. Plant Biol.*  
363 2013;64:807–38.
- 364 36. Jumpponen A, Johnson LC. Can rDNA analyses of diverse fungal communities in  
365 soil and roots detect effects of environmental manipulations--a case study from  
366 tallgrass prairie. *Mycologia.* 2005;97:1177–94.
- 367 37. Chaudhry V, Rehman A, Mishra A, Chauhan PS, Nautiyal CS. Changes in Bacterial  
368 Community Structure of Agricultural Land Due to Long-Term Organic and Chemical  
369 Amendments. *Microb. Ecol.* 2012;64:450–60.
- 370 38. Lupatini M, Korthals GW, de Hollander M, Janssens TKS, Kuramae EE. Soil  
371 Microbiome Is More Heterogeneous in Organic Than in Conventional Farming  
372 System. *Front. Microbiol.* 2017;7:10.3389/fmicb.2016.02064.
- 373 39. Verbruggen E, Røling WFM, Gamper HA, Kowalchuk GA, Verhoef HA, van der  
374 Heijden MGA. Positive effects of organic farming on below-ground mutualists : large-  
375 scale comparison of mycorrhizal fungal communities in agricultural soils. *New*  
376 *Phytol.* 2010;186:968–79.
- 377 40. Liu B, Tu C, Hu S, Gumpertz M, Ristaino JB. Effect of organic, sustainable, and  
378 conventional management strategies in grower fields on soil physical, chemical, and  
379 biological factors and the incidence of Southern blight. *Appl. Soil Ecol.*  
380 2007;37:202–14.

- 381 41. Hartmann M, Widmer F. Community structure analyses are more sensitive to  
382 differences in soil bacterial communities than anonymous diversity indices. *Appl.*  
383 *Environ. Microbiol.* 2006;72:7804–12.
- 384 42. Edwards J, Johnson C, Santos-Medellín C, Lurie E, Podishetty NK, Bhatnagar S, et  
385 al. Structure, variation, and assembly of the root-associated microbiomes of rice.  
386 *Proc. Natl. Acad. Sci.* 2015;112:E911–20.
- 387 43. Seghers D, Wittebolle L, Top EM, Verstraete W, Siciliano S. Impact of agricultural  
388 practices on the *Zea mays* L. endophytic community. *Appl. Environ. Microbiol.*  
389 2004;70:1475–82.
- 390

391 SUPPLEMENTARY FIGURES  
392  
393

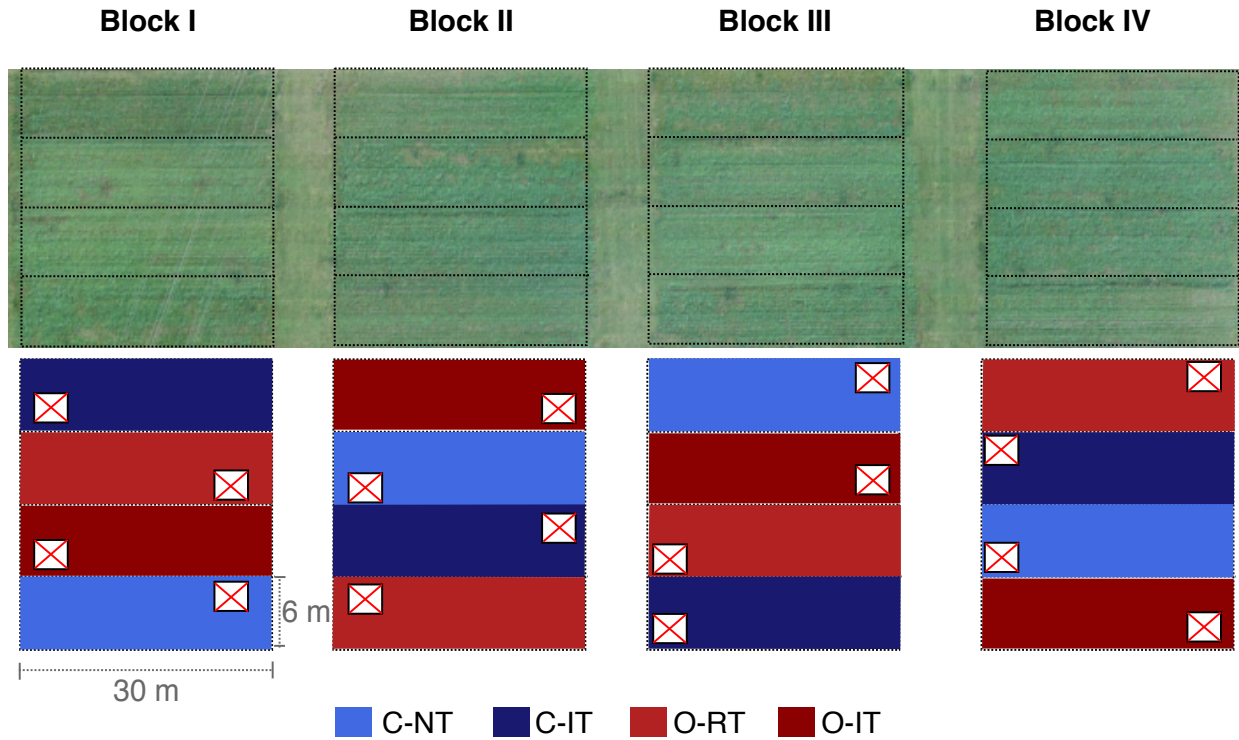

394  
395  
396 **Figure S1:** Experimental layout of the FAST experiment. The top panel is an aerial  
397 photograph of the four blocks at experimental site with individual plots outlined in  
398 dashed lines. The cropping system applied to each plot is indicated in the colored  
399 bottom panel. White boxes marked with X's indicate the approximate sampling location  
400 of root and soil samples within each plot.

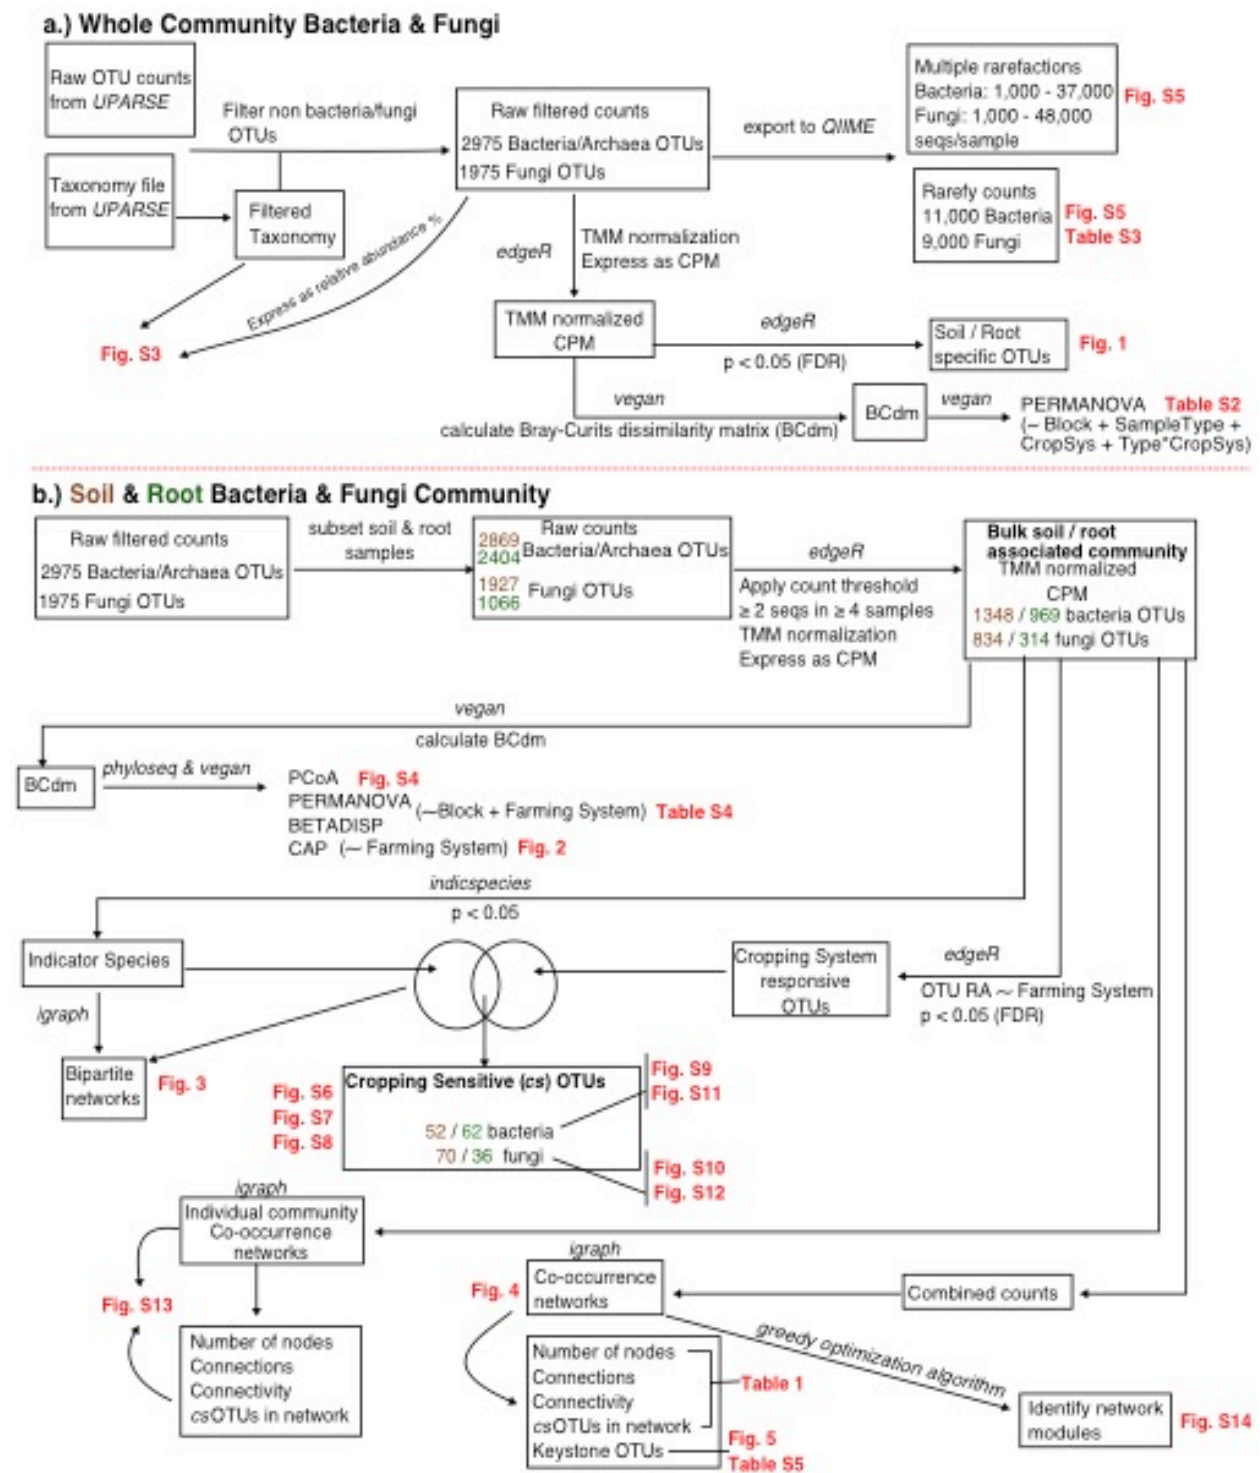

401  
 402  
 403 **Figure S2:** Schematic flow diagram of analysis steps for (a) whole community (b) soil  
 404 and root bacterial and fungal communities. Numbers in brown refer to soil samples.  
 405 Numbers in green refer to root samples. The figures generated as the output from each  
 406 step are indicated in red.

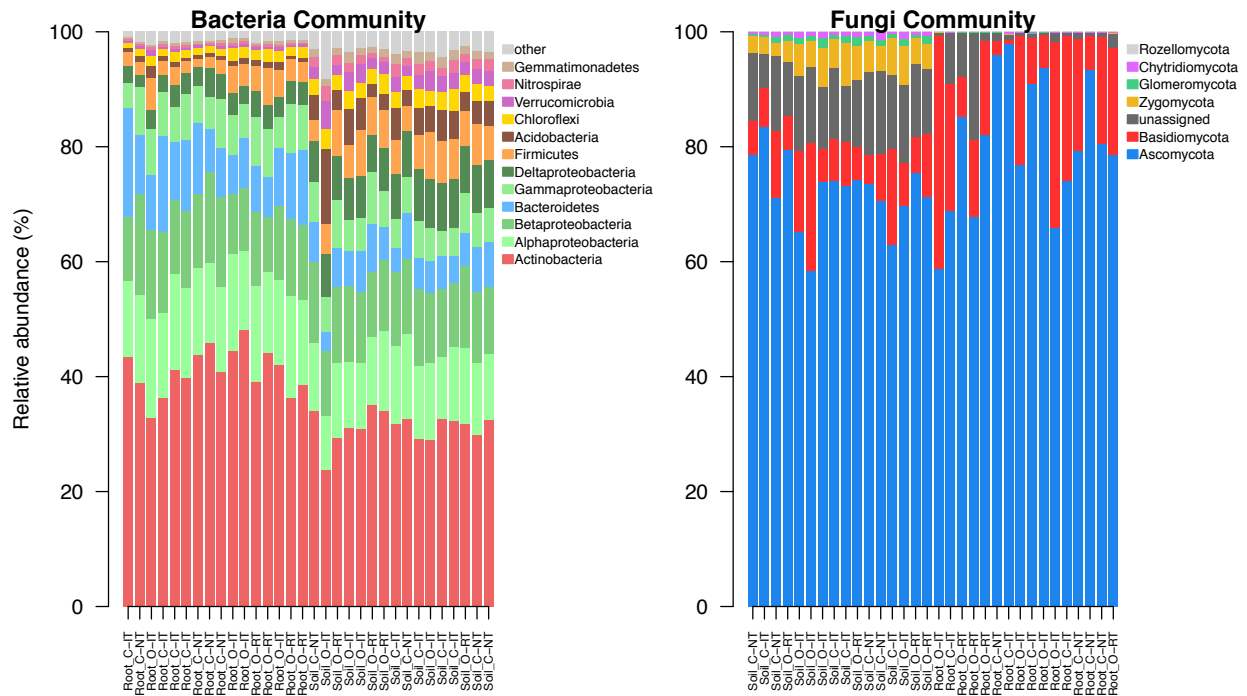

407  
408

409 **Figure S3:** Taxonomic profiles of bacteria **(a)** and fungi **(b)** communities at phylum  
 410 level. Bacteria phyla with relative abundances lower than 1% were summarized with  
 411 'other'. The x-axis sample order reflects a clustering by Bray-Curtis dissimilarities using  
 412 the *hclust* function in R with method "average".

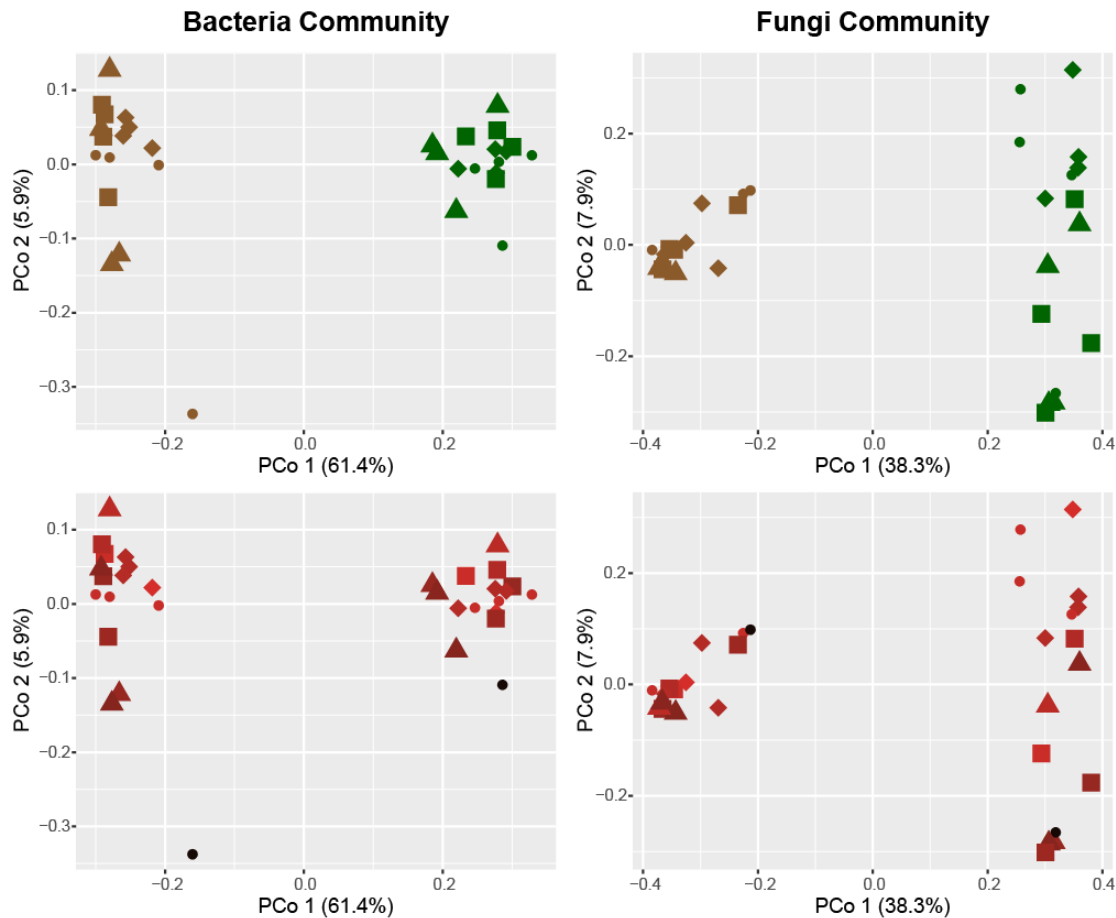

Sample type:

Soil  
Root

Cropping systems:

conventional      organic      management type  
 C-IT   C-NT   O-IT   O-RT  
 intensive   no   intensive   reduced   tillage intensity

pH range:

6.5 7.0 7.5 8.0 8.5

413  
414

415 **Figure S4:** Unconstrained PCoA ordinations of bacteria (left) and fungi (right). Sample  
 416 type presented the major driver of community variation. Percentage of variation given on  
 417 each axis refers to the explained fraction of total variation in the community. Upper and  
 418 lower panels are colored by sample type (root vs. soil samples) and soil pH values,  
 419 respectively. Symbols refer to the different cropping systems.

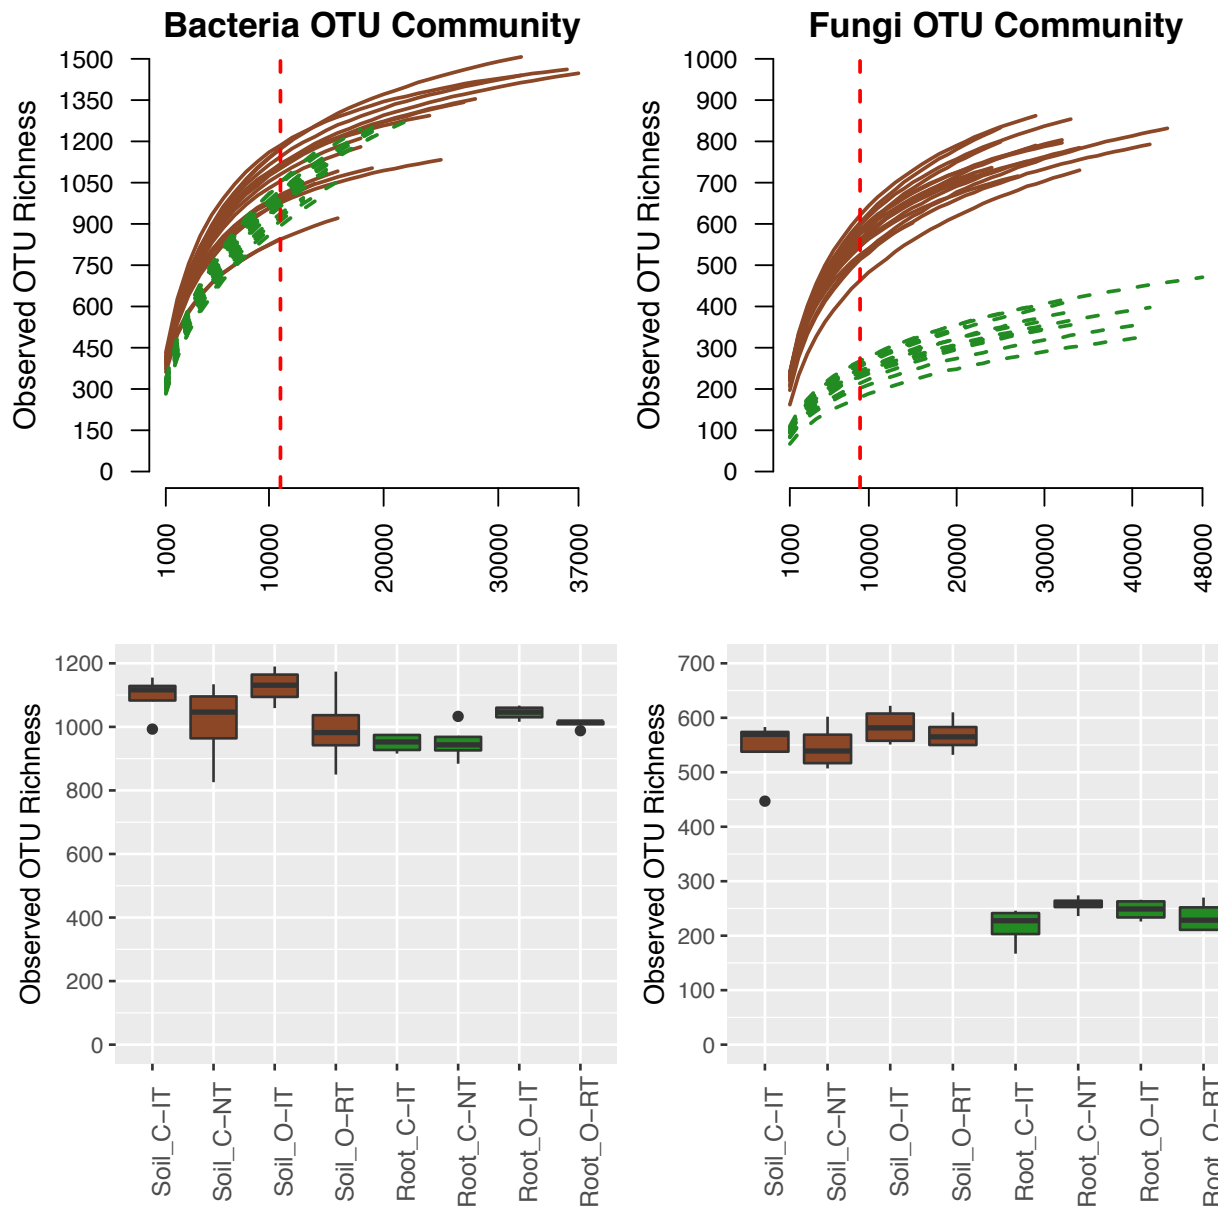

420  
 421  
 422  
 423  
 424  
 425  
 426  
 427  
 428  
 429  
 430

**Figure S5:** Rarefaction curves for bacteria and fungi observed OTU richness. Brown lines indicate soil samples, and green lines indicate root samples. The dashed red line indicates the selected rarefaction depth used to generate the box plots below each curve, 11,000 seqs/sample and 9,000 sequences per sample for bacterial and fungal communities, respectively. The boxplots show the effective OTU richness at the respective rarefaction depths for bacteria and fungi. X axis labels indicate the sample type and cropping system of each box, which are colored by sample type. Results of the t-tests, 2-way ANOVA and subsequent post-hoc tests, if applicable, are given in **Table S3**.



### Cropping Sensitive ...

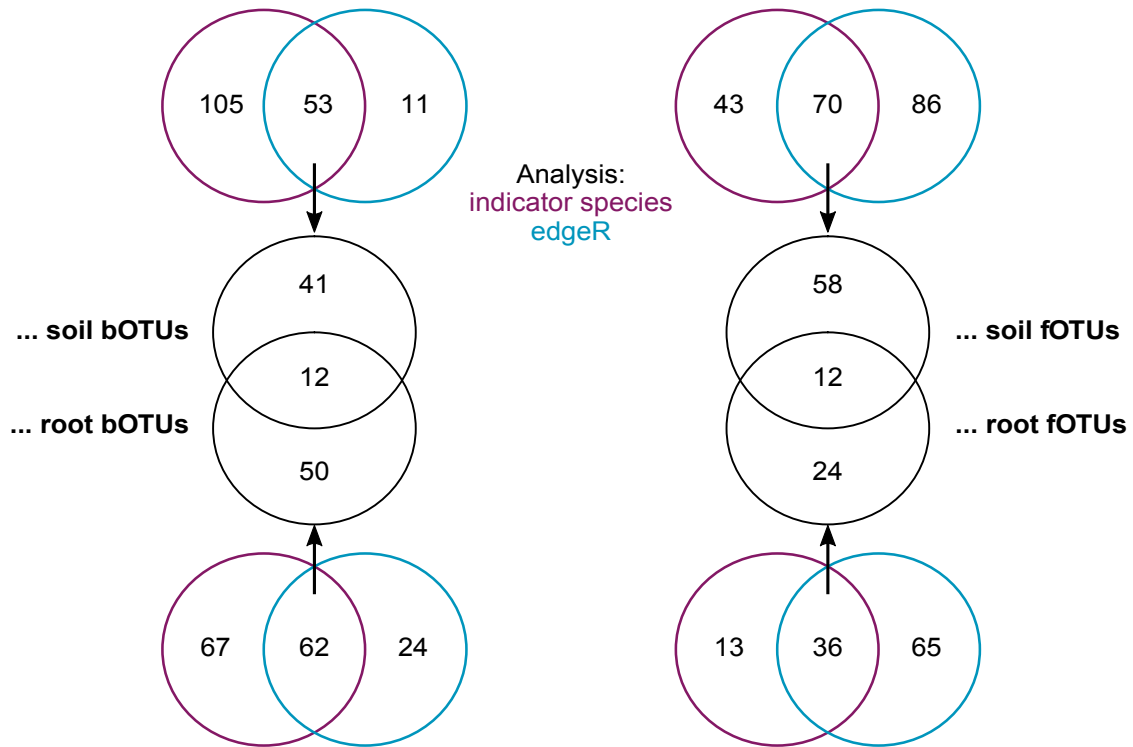

431  
432 **Figure S6:** Defining cropping sensitive bacteria (b-) and fungi (f-) OTUs in soil and root  
433 samples. Venn diagrams show the number of OTUs responding to cropping practices  
434 identified with indicator species analysis (purple) and by edgeR (cyan). OTUs identified  
435 by both methods were defined as cropping sensitive OTUs (*csOTUs*).

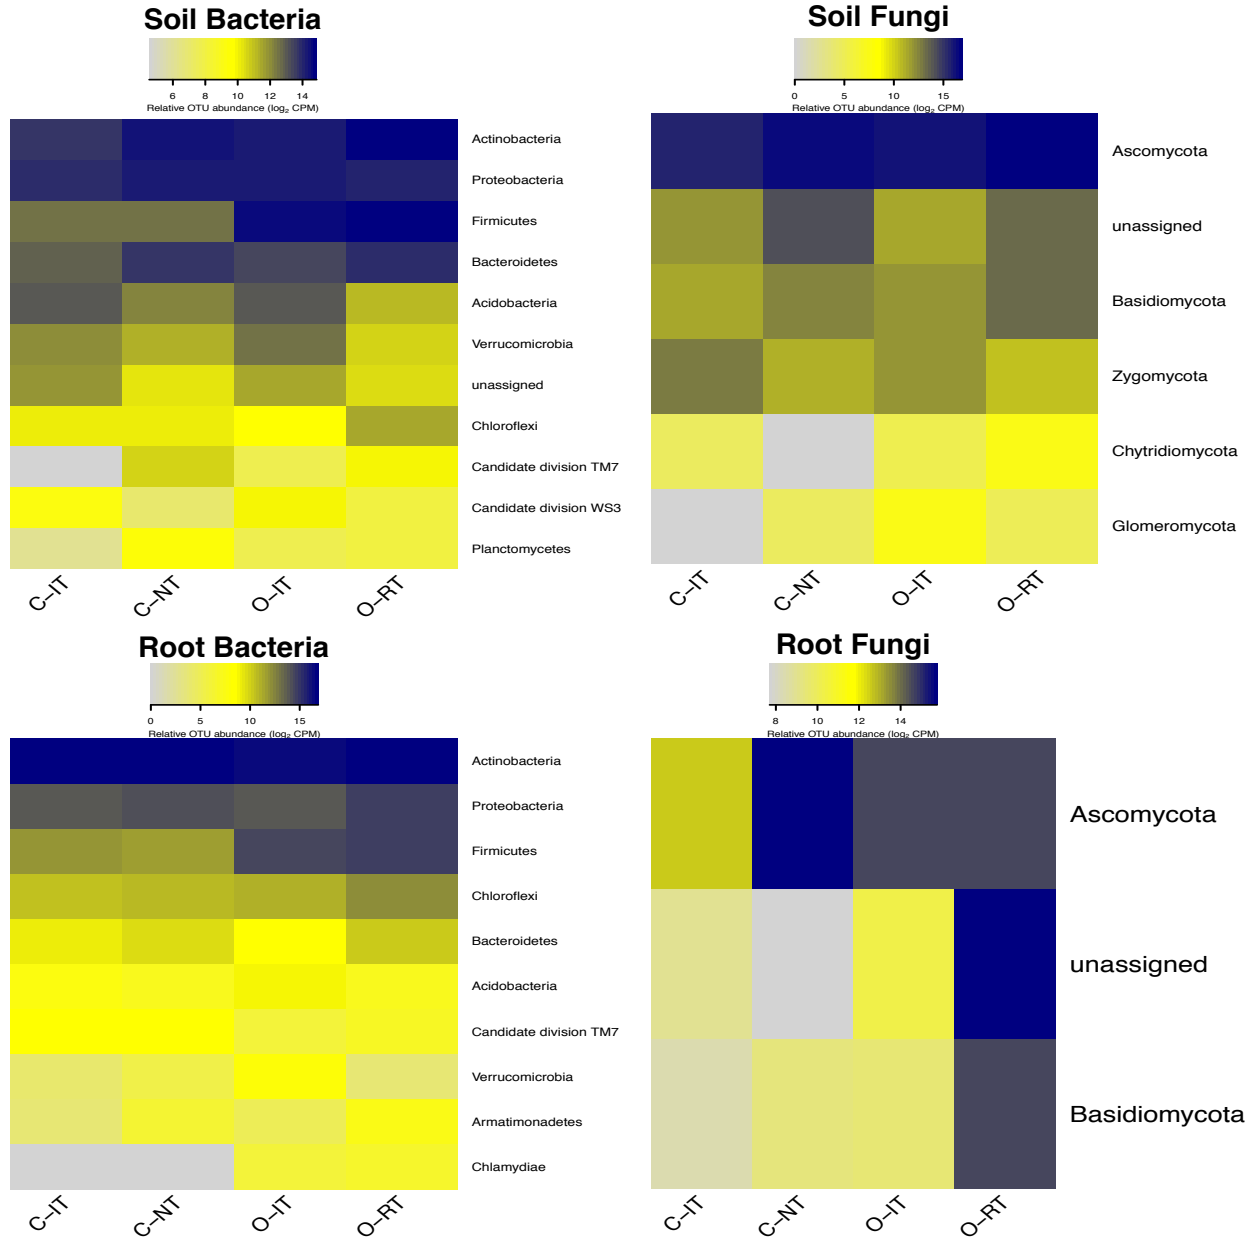

436  
437  
438  
439  
440

**Figure S7:** Mean relative abundances (counts per million, CPM; log<sub>2</sub> scale) of cropping sensitive OTUs (as defined in **Fig. S6**, summarized at phylum level) across cropping systems for soil bacteria, soil fungi, root bacteria, and root fungi.

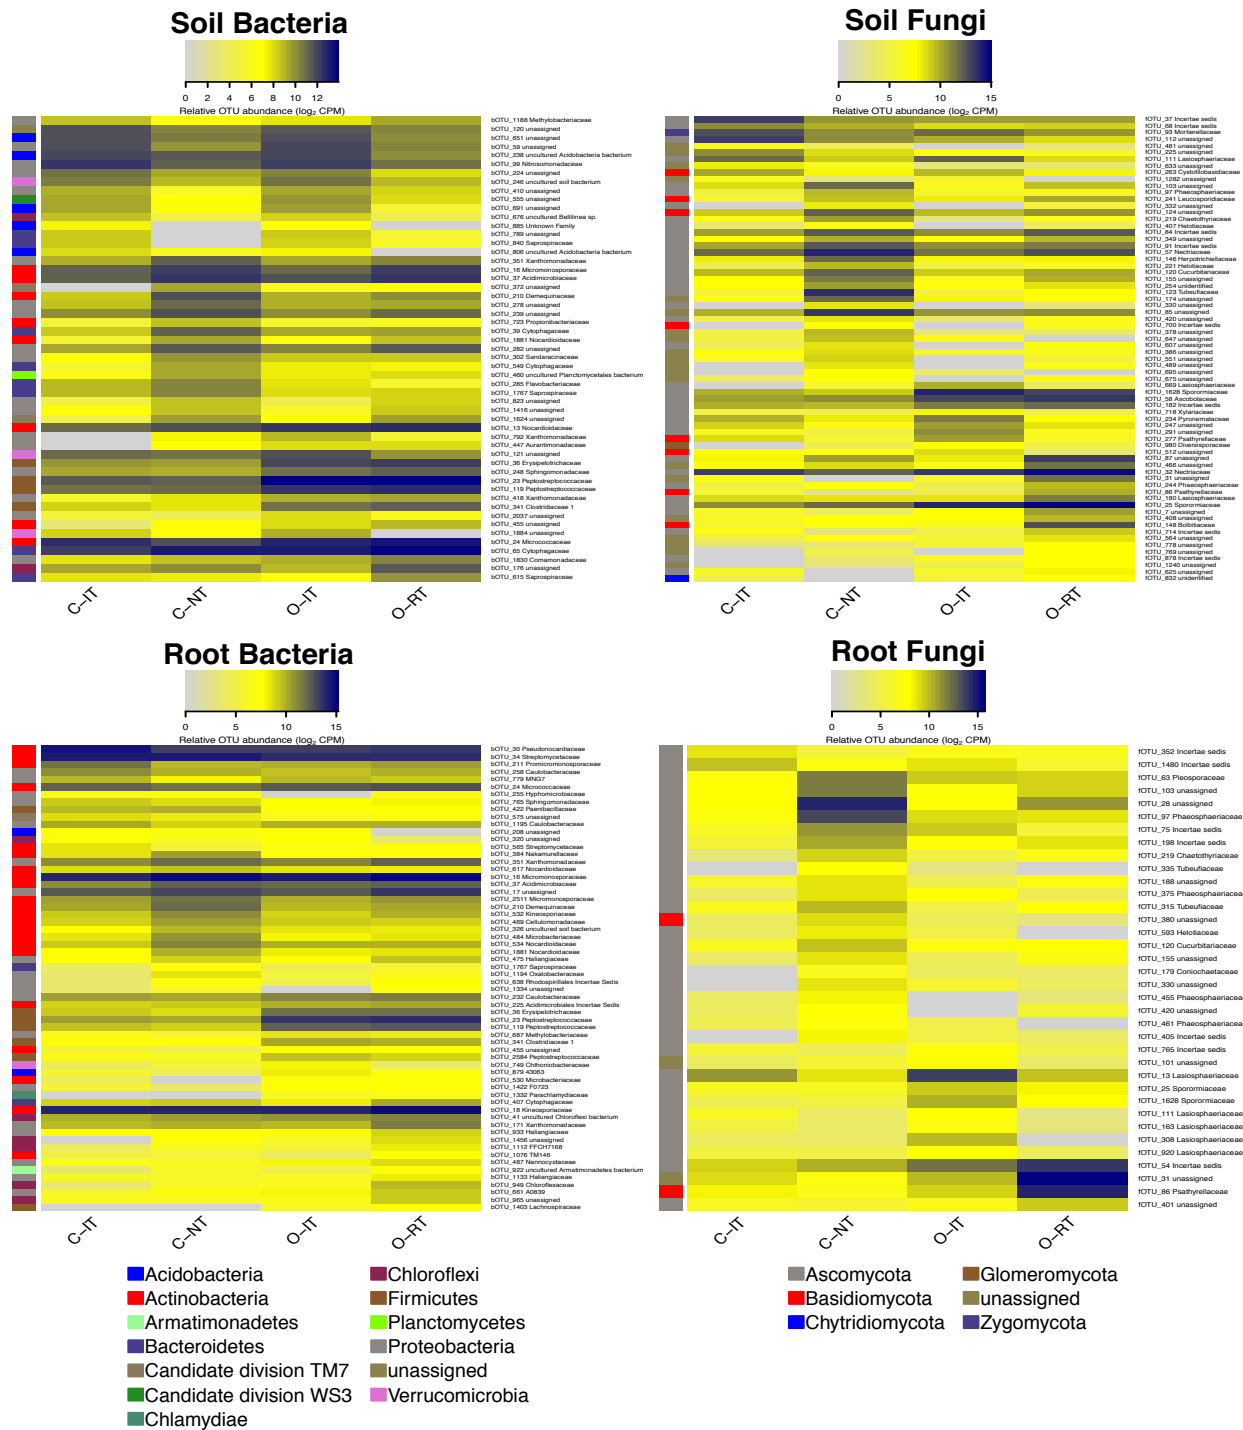

441  
442  
443  
444  
445  
446

**Figure S8:** Mean relative abundances (counts per million, CPM; log<sub>2</sub> scale) of cropping sensitive OTUs identified by indicator species analysis and *edgeR* (see Fig. S6). OTUs are labeled with their family level taxonomy assignment, with the phylum level taxonomy assignment indicated by the colored bars.

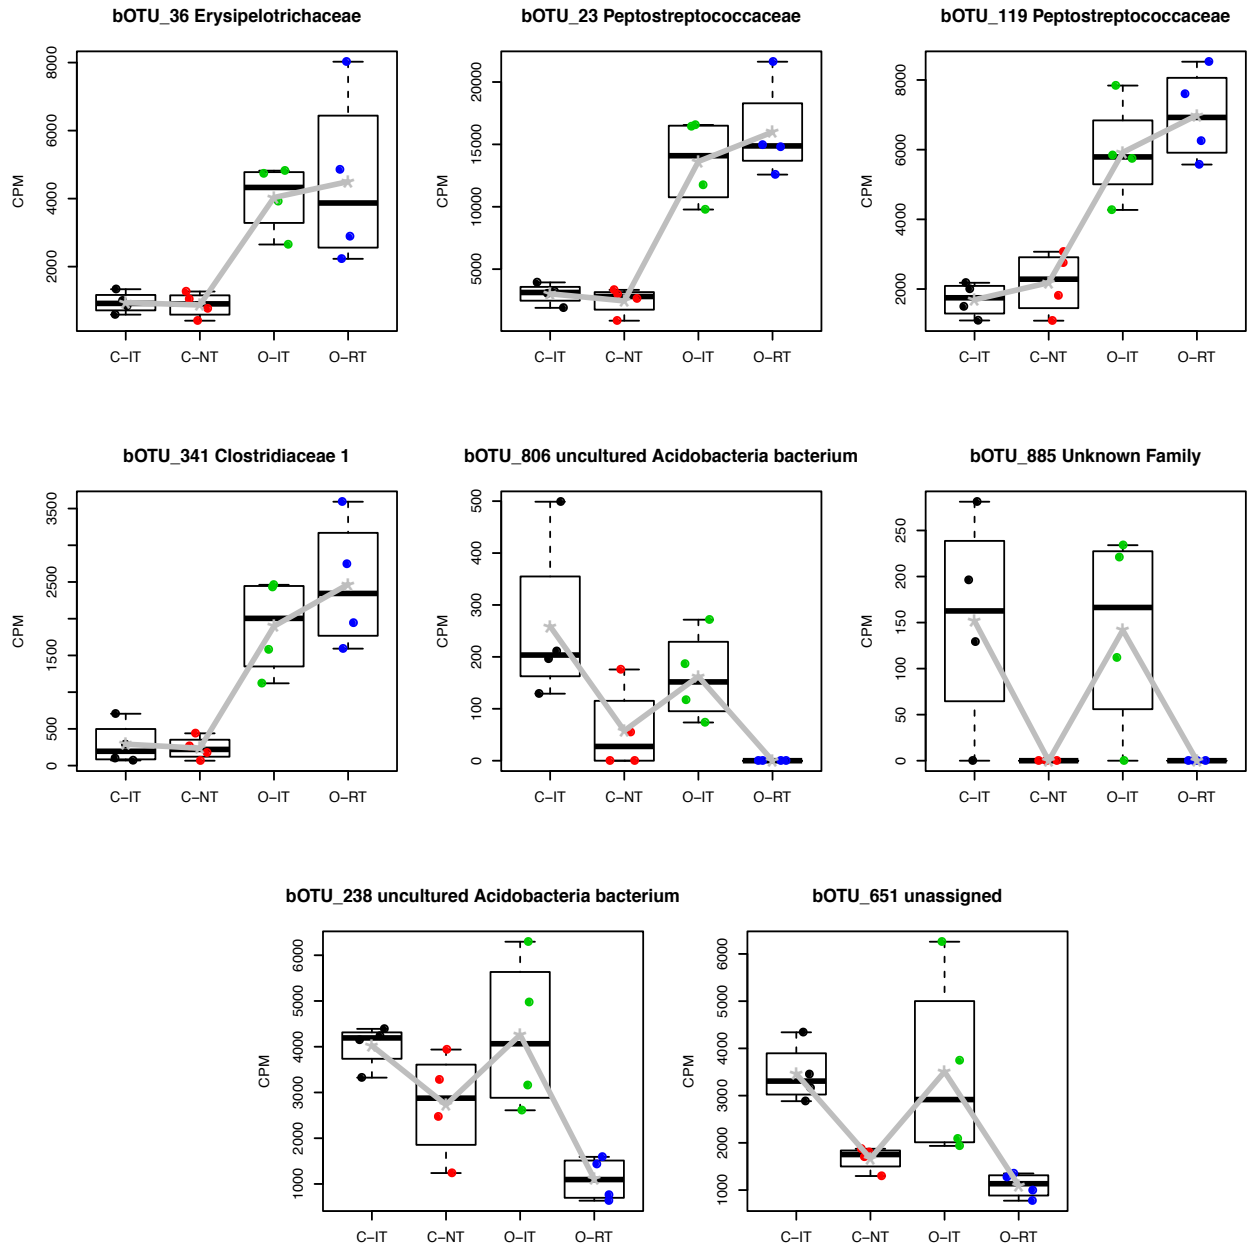

447  
 448  
 449  
 450  
 451

**Figure S9:** Relative abundances (counts per million, CPM) of abundant cropping sensitive bacteria bOTUs in soil. Means within each cropping system are indicated in gray stars.

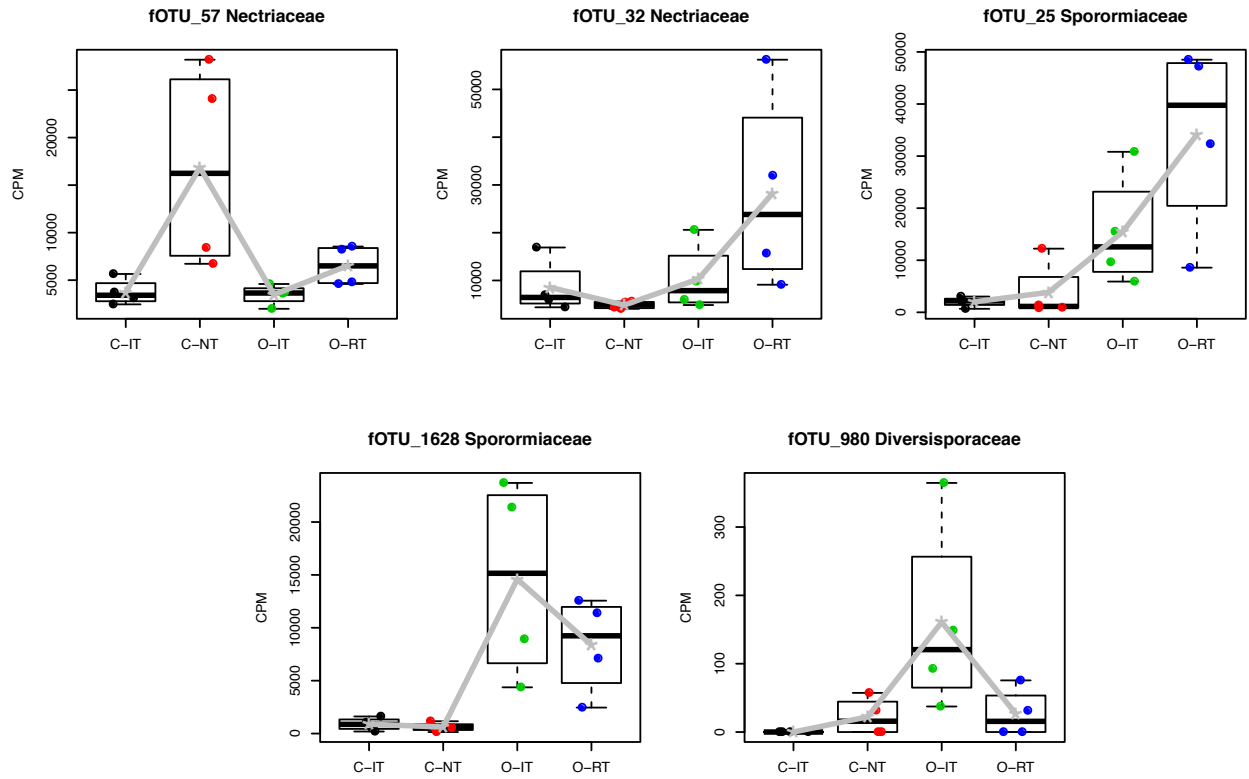

452  
 453  
 454  
 455  
 456

**Figure S10:** Relative abundances (counts per million, CPM) of abundant cropping sensitive fungi fOTUs in soil. Means within each cropping system are indicated in gray stars.

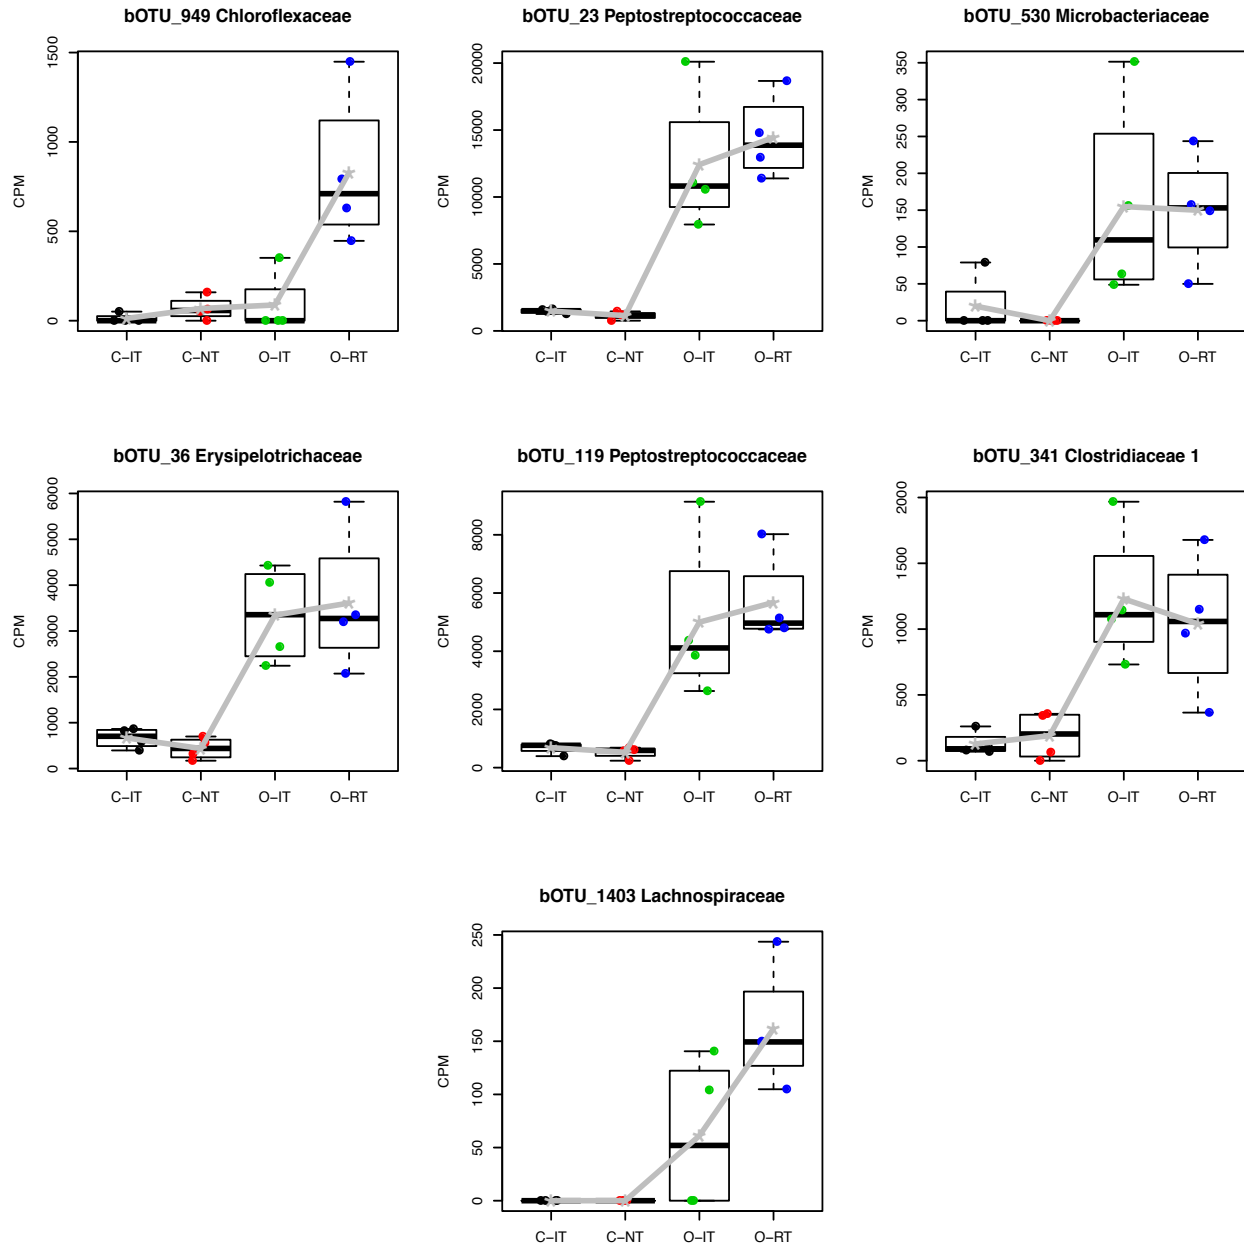

457  
 458  
 459  
 460  
 461

**Figure S11:** Relative abundances (counts per million, CPM) of abundant cropping sensitive bacteria bOTUs in roots. Means within each cropping system are indicated in gray stars.

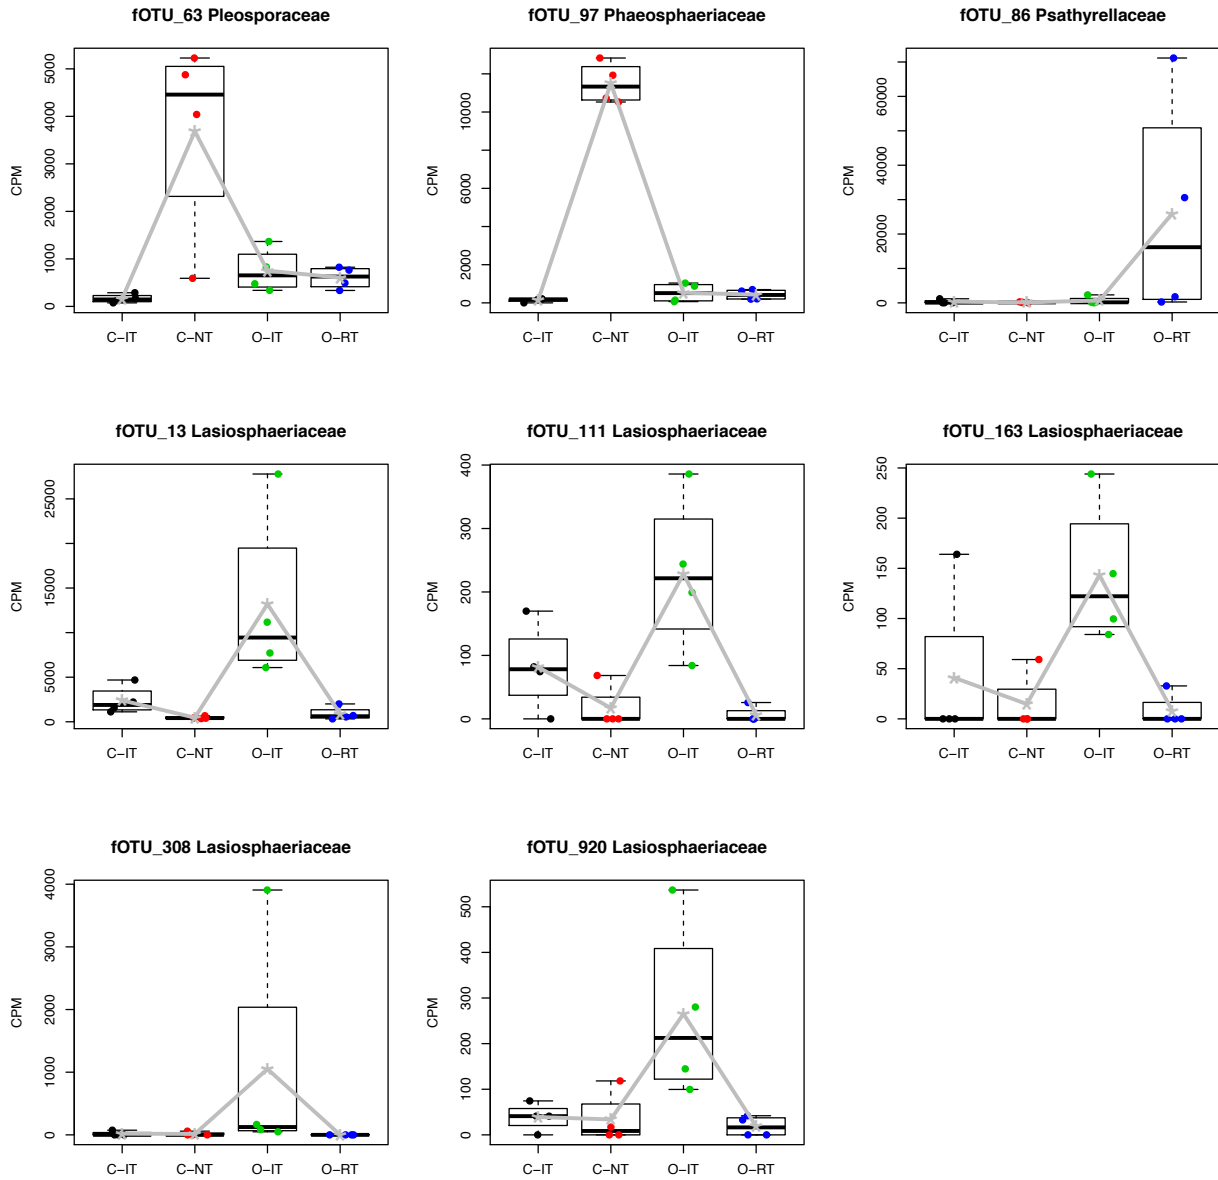

462  
 463  
 464  
 465  
 466

**Figure S12:** Relative abundances (counts per million, CPM) of abundant cropping sensitive fungi fOTUs in roots. Means within each cropping system are indicated in gray stars.

### Soil Bacteria

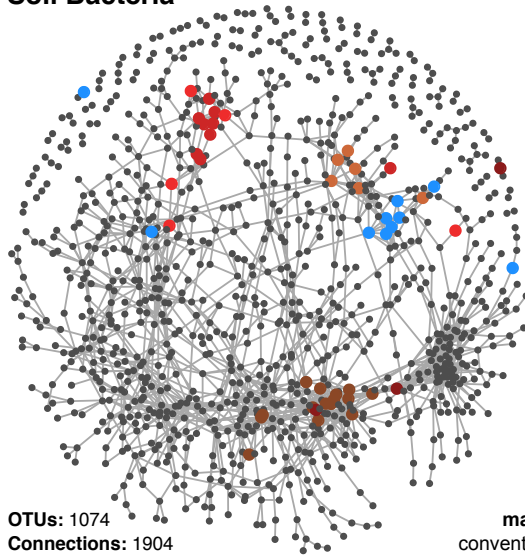

OTUs: 1074  
Connections: 1904  
Avg. Connectivity: 3.5  
csOTUs: 49

### Soil Fungi

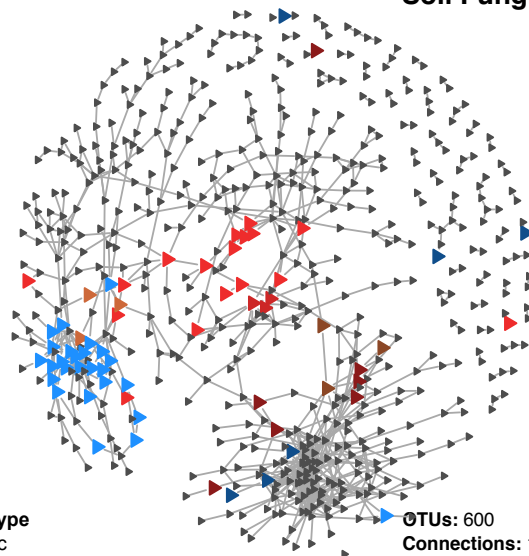

OTUs: 600  
Connections: 1111  
Avg. Connectivity: 3.7  
csOTUs: 65

management type  
conventional organic intensive  
tillage no/reduced

### Root Bacteria

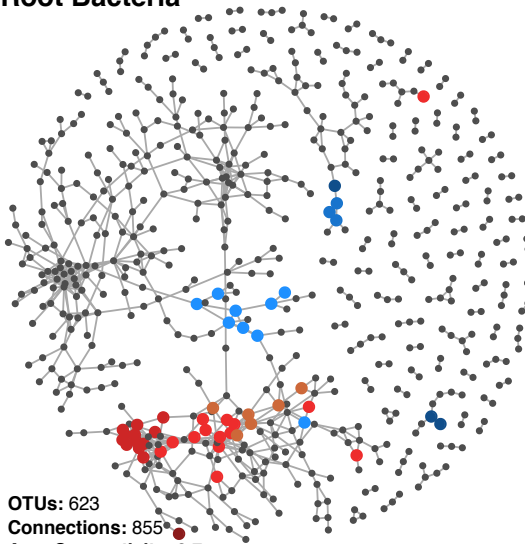

OTUs: 623  
Connections: 855  
Avg. Connectivity: 2.7  
csOTUs: 53

### Root Fungi

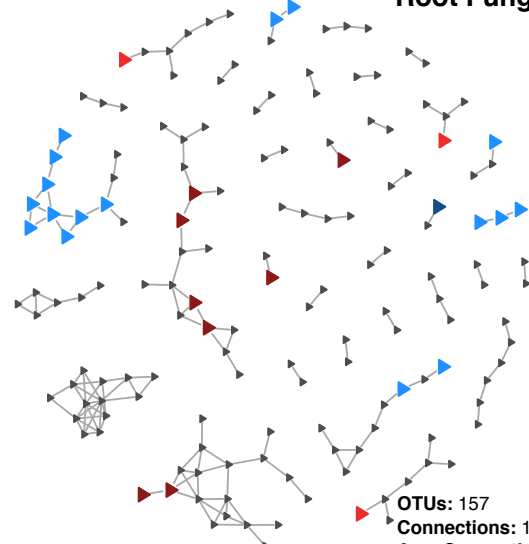

OTUs: 157  
Connections: 159  
Avg. Connectivity: 2.0  
csOTUs: 29

467  
468

469 **Figure S13:** Co-occurrence networks visualizing significant correlations ( $\rho > 0.7$ ,  
470  $p < 0.001$ ; indicated with grey lines) between OTU pairs in the soil and root bacterial and  
471 fungal communities. Circles and triangles represent bacteria and fungi OTUs,  
472 respectively. OTUs were colored by their association to the different cropping systems  
473 (as defined in **Fig. S6**, gray OTUs are insensitive to cropping practices). General  
474 network properties are indicated under each network and include: number of OTUs,  
475 number of connections, average number of connections between OTUs (avg.  
476 connectivity) and the number of cropping sensitive OTUs (csOTUs) in the network.



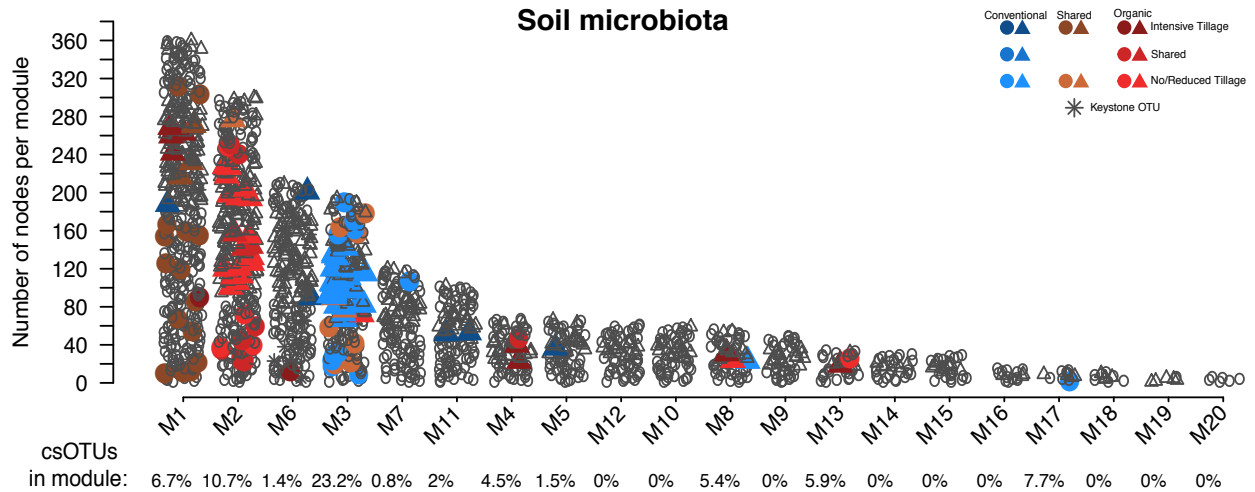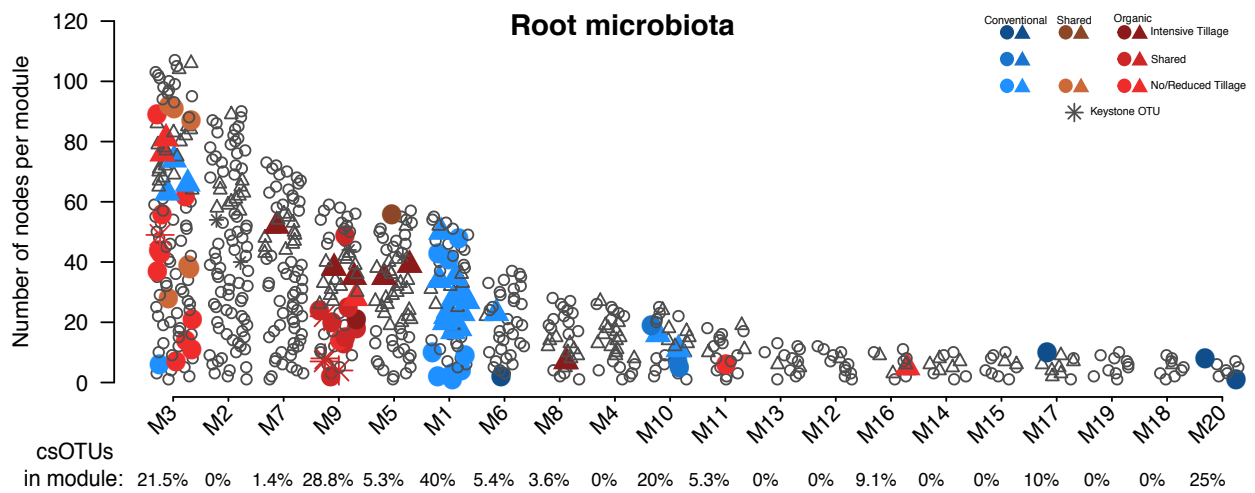

477  
478

479 **Figure S14:** Defining network modules. Plots showing the number of OTUs in the top  
480 20 most populated modules for the soil and root meta co-occurrence networks. Circles  
481 and triangles represent bacteria and fungi OTUs, respectively. OTUs were colored by  
482 their association to the different cropping systems (as defined in **Fig. S6**, gray OTUs  
483 (open symbols) are insensitive to cropping practices). Percentages on the x-axis  
484 indicate the proportion of csOTUs present in each module.

485 **SUPPLEMENTARY TABLES**

486

487 **Table S1:** PCR cycling conditions used to generate the 16S and ITS amplicons for high-  
488 throughput sequencing.

489

| <b>16S</b> |             |       |        | <b>ITS</b> |             |       |        |
|------------|-------------|-------|--------|------------|-------------|-------|--------|
| Step       | Temperature | Time  | Cycles | Step       | Temperature | Time  | Cycles |
| 1          | 94°C        | 2min  | 1x     | 1          | 94°C        | 5min  | 1x     |
| 2          | 94°C        | 30sec | 30x    | 2          | 94°C        | 30sec | 30x    |
| 3          | 55°C        | 30sec |        |            |             |       |        |
| 4          | 65°C        | 30sec |        |            |             |       |        |
| 5          | 65°C        | 10min | 1x     | 5          | 72°C        | 7min  | 1x     |
| 6          | 15°C        | hold  |        | 6          | 15°C        | hold  |        |

490

491 **Table S2:** Results of PERMANOVA testing the effects of *Block*, *Sample type* and  
 492 *Cropping System* on bacterial and fungal communities. Significant effects are indicated  
 493 in bold ( $*p<0.05$ ,  $**p<0.01$ ,  $***p<0.001$ ).  
 494

|                            | <b>Bacteria</b>  |                | <b>Fungi</b>     |                |
|----------------------------|------------------|----------------|------------------|----------------|
|                            | pseudo-F         | R <sup>2</sup> | pseudo-F         | R <sup>2</sup> |
| <b>Block</b> (3,21)        | 1.307            | 0.043          | 0.922            | 0.052          |
| <b>Sample type</b> (1,21)  | <b>54.665***</b> | <b>0.602</b>   | <b>19.886***</b> | <b>0.376</b>   |
| <b>Crop. System</b> (3,21) | <b>2.604*</b>    | <b>0.086</b>   | <b>1.791*</b>    | <b>0.102</b>   |
| <b>Type*CropSys</b> (3,21) | 1.132            | 0.037          | 1.285            | 0.073          |

495 **Table S3:** Statistic testing for differences in  $\alpha$ -diversity between root and soil samples in bacterial and fungal  
 496 communities. Separate t-tests were conducted for each kingdom using a model testing for differences between sample  
 497 types. Similarly, for each sample type we conducted separate ANOVAs testing the effects of *Block* and *Cropping System*.  
 498 Significant effects are indicated in bold ( $*p<0.05$ ,  $***p<0.001$ ). Different letters in the Tukey pairwise comparisons indicate  
 499 significant differences at  $p<0.05$ .  
 500

|                                  | <b>Bacteria</b>                  |                                  | <b>Fungi</b>                     |                                  |
|----------------------------------|----------------------------------|----------------------------------|----------------------------------|----------------------------------|
|                                  | <b>Soil</b>                      | <b>Root</b>                      | <b>Soil</b>                      | <b>Root</b>                      |
| <b>Mean <math>\pm</math> SEM</b> | 1058.31 $\pm$ 27.44              | 988.31 $\pm$ 13.24               | 560.25 $\pm$ 10.98               | 239 $\pm$ 7.06                   |
| <b>T-test</b>                    |                                  |                                  |                                  |                                  |
| <b>Sample type</b> (1,30)        | <b>t=2.3*</b>                    |                                  | <b>t=24.61***</b>                |                                  |
| <b>ANOVA</b>                     |                                  |                                  |                                  |                                  |
| <b>Block</b> (3,9)               | F=2.22                           | F=1.91                           | F=1.25                           | F=0.59                           |
| <b>Crop. system</b> (3,9)        | F=1.88                           | <b>F=7.77**</b>                  | F=1.25                           | F=2.39                           |
| <b>Pairwise Comparisons</b>      |                                  |                                  |                                  |                                  |
| <b>Cropping System</b>           | <b>Mean <math>\pm</math> SEM</b> | <b>Mean <math>\pm</math> SEM</b> | <b>Mean <math>\pm</math> SEM</b> | <b>Mean <math>\pm</math> SEM</b> |
| C-IT                             | 1095.25 $\pm$ 35.3 <b>a</b>      | 949.25 $\pm$ 15.18 <b>a</b>      | 541.25 $\pm$ 34.79 <b>a</b>      | 212.25 $\pm$ 16.78 <b>a</b>      |
| C-NT                             | 1013.25 $\pm$ 67.4 <b>a</b>      | 951 $\pm$ 30.75 <b>a</b>         | 536 $\pm$ 15.19 <b>a</b>         | 252 $\pm$ 8.75 <b>a</b>          |
| O-IT                             | 1127.75 $\pm$ 28.68 <b>a</b>     | 1044 $\pm$ 11.51 <b>b</b>        | 583.75 $\pm$ 16.91 <b>a</b>      | 256.25 $\pm$ 6.84 <b>a</b>       |
| O-RT                             | 997 $\pm$ 66.8 <b>a</b>          | 1009 $\pm$ 7.01 <b>ab</b>        | 577 $\pm$ 11.62 <b>a</b>         | 235.5 $\pm$ 13.91 <b>a</b>       |

501

502 **Table S4:** Results of PERMANOVA testing the effects of *Block* and *Cropping System* on bacterial and fungal communities  
 503 in soil and root samples. Significant effects are indicated in bold ( $*p<0.05$ ,  $**p<0.01$ ,  $***p<0.001$ ). Different letters in the  
 504 pairwise comparisons indicate significant differences at  $p<0.05$  (FDR corrected). Results of BETADISP testing for  
 505 differences in multivariate dispersion between cropping systems in root and soil samples in bacterial and fungal  
 506 communities.  
 507

|                                                       | Soil             |                |                  |                | Root             |                |                 |                |
|-------------------------------------------------------|------------------|----------------|------------------|----------------|------------------|----------------|-----------------|----------------|
|                                                       | Bacteria         |                | Fungi            |                | Bacteria         |                | Fungi           |                |
|                                                       | pseudo-F         | R <sup>2</sup> | pseudo-F         | R <sup>2</sup> | pseudo-F         | R <sup>2</sup> | pseudo-F        | R <sup>2</sup> |
| <b>Block</b> (3,9)                                    | 1.09             | 0.18           | 0.73             | 0.14           | 1.02             | 0.17           | 0.95            | 0.17           |
| <b>Crop. system</b> (3,9)                             | <b>1.85***</b>   | <b>0.31</b>    | <b>1.59*</b>     | <b>0.30</b>    | <b>2.04***</b>   | <b>0.34</b>    | <b>1.54**</b>   | <b>0.28</b>    |
| <b>Pairwise Cropping System Comparisons</b>           |                  |                |                  |                |                  |                |                 |                |
|                                                       | <i>C-IT (a)</i>  |                | <i>C-IT (ac)</i> |                | <i>C-IT (a)</i>  |                | <i>C-IT (a)</i> |                |
|                                                       | <i>C-NT (b)</i>  |                | <i>C-NT (a)</i>  |                | <i>C-NT (b)</i>  |                | <i>C-NT (a)</i> |                |
|                                                       | <i>O-IT (ab)</i> |                | <i>O-IT (b)</i>  |                | <i>O-IT (c)</i>  |                | <i>O-IT (a)</i> |                |
|                                                       | <i>O-RT (c)</i>  |                | <i>O-RT (c)</i>  |                | <i>O-RT (ac)</i> |                | <i>O-RT (a)</i> |                |
| <b>Multivariate homogeneity of groups dispersions</b> |                  |                |                  |                |                  |                |                 |                |
| <b>Crop. system</b> (3,12)                            | 1.25             |                | 1.20             |                | 0.61             |                | 0.01            |                |

508 **Table S5:** Keystone OTUs identified in soil and root microbial communities documented with taxonomy assignments,  
 509 OTU IDs, degree of co-occurrence values, and sensitivity to cropping practices.  
 510

|                                 | Phylum              | Class               | Order               | Family                | Genus             | Node         | Degree     | csOTU      |    |
|---------------------------------|---------------------|---------------------|---------------------|-----------------------|-------------------|--------------|------------|------------|----|
| <b>Soil microbial community</b> |                     |                     |                     |                       |                   |              |            |            |    |
| Bacteria                        | Actinobacteria      | Thermoleophilia     | Gaiellales          | unassigned            | unassigned        | bOTU_537     | 44         | No         |    |
|                                 | Chloroflexi         | Chloroflexia        | Chloroflexales      | Roseiflexaceae        | Roseiflexus       | bOTU_443     | 35         | No         |    |
|                                 | Proteobacteria      | Alphaproteobacteria |                     | Rhizobiales           | JG34-KF-361       | unassigned   | bOTU_1110  | 52         | No |
|                                 |                     |                     |                     |                       | Xanthobacteraceae | Pseudolabrys | bOTU_96    | 57         | No |
|                                 |                     | Betaproteobacteria  | SC-I-84             |                       | unassigned        | unassigned   | bOTU_62    | 55         | No |
|                                 |                     |                     |                     |                       |                   |              | bOTU_411   | 35         | No |
|                                 | Gammaproteobacteria | TRA3-20             |                     |                       |                   | bOTU_180     | 41         | No         |    |
|                                 |                     | Gammaproteobacteria | Xanthomonadales     |                       |                   |              | bOTU_331   | 44         | No |
| Verrucomicrobia                 | OPB35 soil group    | unassigned          |                     |                       |                   | bOTU_637     | 38         | No         |    |
|                                 |                     |                     |                     |                       |                   | bOTU_897     | 38         | No         |    |
| Fungi                           | Ascomycota          | Sordariomycetes     | Chaetosphaeriales   | Chaetosphaeriaceae    | Chaetosphaeria    | fOTU_278     | 42         | No         |    |
|                                 |                     | Sordariomycetes     | Chaetosphaeriales   | Chaetosphaeriaceae    |                   | fOTU_71      | 42         | No         |    |
|                                 |                     | Sordariomycetes     | Sordariales         |                       |                   | fOTU_641     | 43         | No         |    |
|                                 | Basidiomycota       | Tremellomycetes     |                     |                       |                   | fOTU_831     | 57         | No         |    |
|                                 | unassigned          | unassigned          | unassigned          | unassigned            | unassigned        |              | fOTU_494   | 70         | No |
|                                 |                     |                     |                     |                       |                   |              | fOTU_208   | 46         | No |
|                                 |                     |                     |                     |                       |                   |              | fOTU_450   | 46         | No |
|                                 |                     |                     |                     |                       |                   |              | fOTU_201   | 38         | No |
| Zygomycota                      | Incertae sedis      | Mortierellales      | Mortierellaceae     | Mortierella           | fOTU_337          | 43           | No         |            |    |
| <b>Root microbial community</b> |                     |                     |                     |                       |                   |              |            |            |    |
| Bacteria                        | Acidobacteria       | Acidobacteria       | Subgroup 2          | unassigned            | unassigned        | bOTU_1141    | 18         | No         |    |
|                                 | Actinobacteria      | Actinobacteria      | Micrococcales       | Microbacteriaceae     | Leucobacter       | bOTU_530     | 18         | <b>Yes</b> |    |
|                                 |                     | Thermoleophilia     | Gaiellales          | unassigned            | unassigned        | bOTU_1091    | 17         | No         |    |
|                                 | Chloroflexi         | Chloroflexia        | Chloroflexales      | Chloroflexaceae       | Chloronema        | bOTU_949     | 17         | <b>Yes</b> |    |
|                                 | Firmicutes          | Bacilli             | Bacillales          | unassigned            | unassigned        | bOTU_267     | 21         | No         |    |
|                                 |                     | Clostridia          | Clostridiales       | Peptostreptococcaceae | Incertae Sedis    | bOTU_23      | 17         | <b>Yes</b> |    |
|                                 |                     |                     |                     |                       |                   | bOTU_119     | 16         | <b>Yes</b> |    |
|                                 | Erysipelotrichia    | Erysipelotrichales  | Erysipelotrichaceae | Turicibacter          | bOTU_36           | 16           | <b>Yes</b> |            |    |
| Proteobacteria                  | Alphaproteobacteria | Rhizobiales         | unassigned          | unassigned            | bOTU_54           | 16           | No         |            |    |
